# Supplementary material
Source: ML conference proceedings conference paper supplement (https://openaccess.thecvf.com/content/CVPR2024/html/Liu_Video_Frame_Interpolation_CVPR_2024_paper.html)
Supplement: Supplementary file 1 [file Liu_Video_Frame_Interpolation_CVPR_2024_supplemental.zip]

Archive with 4 entries (4 files):
- Paper_id_9959_supp.pdf
- __MACOSX/._Paper_id_9959_supp.pdf
- video.mp4
- __MACOSX/._video.mp4
